# Supplementary material
Source: ML conference proceedings conference paper supplement (https://proceedings.neurips.cc/paper_files/paper/2016/hash/c4492cbe90fbdbf88a5aec486aa81ed5-Abstract.html)
Supplement: Supplementary file 2 [file c4492cbe90fbdbf88a5aec486aa81ed5-Supplemental.zip]

Archive with 1 entries (1 files):
- supp.pdf
